# Supplementary material
Source: PubMed Central journal article supplement (PMC3299894)
Supplement: NIHMS331355-supplement-Supp_Table_S1-S3.pdf [file NIHMS331355-supplement-Supp_Table_S1-S3.pdf]

**Supplemental Table 1:** Differential expression of miRNAs, based on microarray data, between *C. parvum*-treated and control wild-type mice.

| <u>MiRNA Probe</u> | <u>MIRNA</u>   | <u>P-Val</u> | <u>FDR</u> | <u>Fold change<br/>C. Parv vs.<br/>Control</u> | <u>Location</u> | <u>Host Gene</u>         |
|--------------------|----------------|--------------|------------|------------------------------------------------|-----------------|--------------------------|
| mmu-mir-486-a      | mmu-miR-486    | 0.00003      | 0.001      | 5.28                                           | 8qA2            | Ank1, Q02357-2, Q02357-8 |
| mmu-mir-451-a      | mmu-miR-451    | 0.00007      | 0.002      | 3                                              | 11qB5           | intergenic               |
| mmu-mir-222-a      | mmu-miR-222    | 0.00024      | 0.003      | 2.32                                           | XqA1.3          | intergenic               |
| mmu-mir-7-2-a      | mmu-miR-7a2    | 0.00002      | 0.001      | 2.19                                           | 7qD3            | intergenic               |
| mmu-mir-448-a      | mmu-miR-448    | 0.00189      | 0.014      | 1.91                                           | XqF2            | Htr2c                    |
| mmu-mir-483-a      | mmu-miR-483*   | 0.00193      | 0.014      | 1.89                                           | 7qF5            | Igf2                     |
| mmu-mir-702-a      | mmu-miR-702    | 0.000001     | 0          | 1.84                                           | 5qG2            | Plod3                    |
| mmu-mir-22-a       | mmu-mir-22     | 0.00132      | 0.012      | 1.72                                           | 11qB5           | RP23-384C18.7            |
| mmu-mir-328-a      | mmu-mir-328    | 0.0085       | 0.031      | 1.67                                           | 8qD3            | Elmo3                    |
| mmu-mir-196a-2-a   | mmu-mir-196a-2 | 0.00134      | 0.012      | 1.64                                           | 15qF3           | intergenic               |
| mmu-mir-223-a      | mmu-mir-223    | 0.00008      | 0.002      | 1.63                                           | XqC3            | intergenic               |
| mmu-mir-27a-a      | mmu-mir-27a    | 0.00567      | 0.027      | 1.62                                           | 8qC3            | intergenic               |
| mmu-mir-200b-p     | mmu-mir-200b   | 0.00544      | 0.026      | 1.6                                            | 4qE2            | RP23, Tll10              |
| mmu-mir-9-3-5p-a   | mmu-mir-9-3    | 0.00369      | 0.021      | 1.59                                           | 7qD3            | intergenic               |
| mmu-mir-290-a      | mmu-mir-290    | 0.00528      | 0.026      | 1.51                                           | 7qA1            | intergenic               |
| mmu-mir-29c-p      | mmu-mir-29c    | 0.00137      | 0.012      | 1.4                                            | 1qH6            | intergenic               |
| mmu-mir-212-a      | mmu-mir-212    | 0.00167      | 0.013      | 1.38                                           | 11qB5           | RP23-143A14              |
| mmu-mir-497-a      | mmu-miR-497    | 0.00155      | 0.013      | 1.37                                           | 11qB3           | intergenic               |
| mmu-mir-487b-a     | mmu-mir-487b   | 0.00326      | 0.019      | 1.36                                           | 12qF1           | intergenic               |
| mmu-mir-92-1-a     | mmu-mir-92a    | 0.00496      | 0.025      | 1.19                                           | 14qE4           | intergenic               |
| mmu-mir-23a-a      | mmu-mir-23a    | 0.00155      | 0.013      | 0.8                                            | 8qC3            | intergenic               |
| mmu-mir-26a-1-a    | mmu-mir-26a-1  | 0.00441      | 0.023      | 0.71                                           | 9qF3            | Ctdspl                   |
| mmu-mir-682-a      | mmu-mir-682    | 0.00015      | 0.002      | 0.71                                           | 13qC1           | ENSMUST00000099371       |
| mmu-mir-26a-2-a    | mmu-mir-26a-2  | 0.00608      | 0.027      | 0.71                                           | 10qD3           | Ctdsp2                   |
| mmu-mir-99b-a      | mmu-mir-99b    | 0.00589      | 0.027      | 0.7                                            | 17qA3.2         | intergenic               |
| mmu-mir-181a-5p-a  | mmu-miR-181a1  | 0.00028      | 0.004      | 0.32                                           | 1qE4            | intergenic               |
| mmu-mir-181c-a     | mmu-mir-181c   | 0.00051      | 0.006      | 0.31                                           | 8qC3            | intergenic               |
| mmu-mir-99a-a      | mmu-mir-99a    | 0.00047      | 0.006      | 0.29                                           | 16qC3.1         | ENSMUST00000114231       |
| mmu-mir-143-a      | mmu-mir-143    | 0.00837      | 0.031      | 0.26                                           | 18qE1           | intergenic               |
| mmu-mir-703-a      | mmu-miR-703    | 0.00001      | 0.001      | 0.26                                           | 5qE3            | 1700007G11Rik            |
| mmu-mir-699-a      | mmu-miR-699    | 0.00001      | 0.001      | 0.19                                           | 4qB1            | intergenic               |
| mmu-mir-214-a      | mmu-miR-214    | 0.00003      | 0.001      | 0.61                                           | 1qH2.1          | Dnm3                     |
| mmu-mir-320-a      | mmu-miR-320    | 0.00244      | 0.016      | 0.61                                           | 14qD2           | intergenic               |

|                      |                |         |       |      |        |               |
|----------------------|----------------|---------|-------|------|--------|---------------|
| mmu-mir-297-2-a      | mmu-mir-297a-2 | 0.00738 | 0.029 | 0.6  | 10qB2  | Sobp          |
| mmu-mir-24-1-3p-a    | mmu-miR-24-1   | 0.00001 | 0.001 | 0.6  | 13qB3  | 2010111101Rik |
| mmu-mir-192-a        | mmu-miR-192    | 0.00713 | 0.028 | 0.59 | 19qA   | intergenic    |
| mmu-mir-150-a        | mmu-miR-150    | 0.0065  | 0.027 | 0.59 | 7qB4   | intergenic    |
| mmu-mir-152-a        | mmu-miR-152    | 0.00776 | 0.03  | 0.56 | 11qD   | Copz2         |
| mmu-mir-706-a        | mmu-mir-706    | 0.0058  | 0.027 | 0.55 | 6qF1   | Wnk1          |
| mmu-mir-28-p         | mmu-miR-28*    | 0.00025 | 0.003 | 0.49 | 16qB1  | Lpp           |
| mmu-mir-341-a        | mmu-miR-341    | 0.00089 | 0.009 | 0.48 | 12qF1  | intergenic    |
| mmu-mir-7-1-p        | mmu-miR-7a*    | 0.00502 | 0.025 | 0.47 | 13qB1  | Hnrpk         |
| mmu-mir-140*-3p-a    | mmu-mir-140*   | 0.00249 | 0.016 | 0.46 | 8qD3   | Wwp2          |
| mmu-mir-10b-a        | mmu-miR-10b    | 0.00571 | 0.027 | 0.46 | 2qC3   | Hoxd3/Hoxd4   |
| mmu-mir-500-a        | mmu-miR-500    | 0.00285 | 0.017 | 0.46 | XqA1.1 | Clcn5         |
| mmu-mir-29b-2-a      | mmu-miR-29b-2  | 0.00053 | 0.006 | 0.46 | 1qH6   | intergenic    |
| mmu-mir-29c-a        | mmu-miR-29c    | 0.00323 | 0.019 | 0.45 | 1qH6   | intergenic    |
| mmu-mir-181b-2-a     | mmu-miR-181b-2 | 0.00694 | 0.028 | 0.45 | 2qB    | Nr6a1         |
| mmu-mir-361-a        | mmu-mir-361    | 0.00838 | 0.031 | 0.44 | XqE1   | Chm           |
| mmu-mir-29b-1-a      | mmu-miR-29b-1  | 0.00008 | 0.002 | 0.44 | 6qA3.3 | intergenic    |
| mmu-mir-213-a        | mmu-mir-181b   | 0.00398 | 0.022 | 0.43 | 1qE4   | intergenic    |
| mmu-mir-199a*-2-3p-a | mmu-miR-199a-1 | 0.00015 | 0.002 | 0.42 | 9qA3   | Dnm2          |
| mmu-mir-196a-2-p     | mmu-miR-196a*  | 0.00009 | 0.002 | 0.41 | 15qF3  | intergenic    |
| mmu-mir-29b-a        | mmu-miR-29b-1  | 0.00007 | 0.002 | 0.41 | 6qA3.3 | intergenic    |
| mmu-mir-29a-a        | mmu-miR-29a    | 0.0011  | 0.01  | 0.4  | 6qA3.3 | intergenic    |
| mmu-mir-199a*-3p-a   | mmu-miR-199a-1 | 0.00013 | 0.002 | 0.4  | 9qA3   | Dnm2          |
| mmu-mir-199a*-1-3p-a | mmu-miR-199a-1 | 0.0001  | 0.002 | 0.4  | 9qA3   | Dnm2          |
| mmu-mir-34a-a        | mmu-mir-34a    | 0.00948 | 0.033 | 0.39 | 4qE2   | intergenic    |
| mmu-mir-203-a        | mmu-miR-203    | 0.00696 | 0.028 | 0.39 | 12qF1  | intergenic    |
| mmu-mir-145-a        | mmu-miR-145    | 0.00012 | 0.002 | 0.38 | 18qE1  | intergenic    |
| mmu-mir-100-a        | mmu-miR-100    | 0.00019 | 0.003 | 0.37 | 9qA5.1 | intergenic    |
| mmu-mir-215-a        | mmu-miR-215    | 0.00222 | 0.016 | 0.36 | 1qH5   | lars2         |
| mmu-mir-138-a-2      | mmu-miR-138    | 0.00196 | 0.014 | 0.36 | 8qC5   | intergenic    |
| mmu-mir-30a-3p-a     | mmu-miR-30a*   | 0.0062  | 0.027 | 0.35 | 1qA5   | intergenic    |

**Supplemental Table 2:** Differential expression of miRNAs, based on microarray data, between *C. parvum*-treated and control NOS2 knockout mice.

| <u>MiRNA Probe</u> | <u>MIRNA</u>   | <u>P-Val</u> | <u>FDR</u> | <u>Fold change<br/>C. Parv vs.<br/>Control</u> | <u>Location</u> | <u>Host Gene</u>          |
|--------------------|----------------|--------------|------------|------------------------------------------------|-----------------|---------------------------|
| mmu-mir-486-a      | mmu-miR-486    | 0.003628     | 0.032      | 4.3065002                                      | 8qA2            | Ank1, Q02357-2, Q02357-8  |
| mmu-mir-7-2-a      | mmu-miR-7a2    | 0.001731     | 0.023      | 1.9866787                                      | 7qD3            | intergenic                |
| mmu-mir-702-a      | mmu-miR-702    | 0.007551     | 0.048      | 1.8656503                                      | 5qG2            | Plod3                     |
| mmu-mir-222-a      | mmu-miR-222    | 0.001566     | 0.022      | 1.7459383                                      | XqA1.3          | intergenic                |
| mmu-mir-497-a      | mmu-miR-497    | 0.002111     | 0.024      | 1.6810937                                      | 11qB3           | intergenic                |
| mmu-mir-451-a      | mmu-miR-451    | 0.009039     | 0.055      | 1.6321711                                      | 11qB5           | intergenic                |
| mmu-mir-330-p      | mmu-miR-330    | 0.004279     | 0.036      | 1.6224153                                      | 7qA3            | Eml2                      |
| mmu-mir-223-a      | mmu-miR-223    | 3.01E-05     | 0.003      | 1.5079849                                      | XqC3            | intergenic                |
| mmu-mir-21-a       | mmu-miR-21     | 0.000659     | 0.017      | 1.5013322                                      | 11qC            | Tmem49, RP23-467J12.4-001 |
| mmu-mir-346-a      | mmu-miR-346    | 0.000447     | 0.016      | 1.3515956                                      | 14qB            | Grid1                     |
| mmu-mir-293-a      | mmu-miR-293    | 0.009632     | 0.058      | 0.6754114                                      | 7qA1            | intergenic                |
| mmu-mir-191-a      | mmu-miR-191    | 0.003581     | 0.032      | 0.6503657                                      | 9qF2            | intergenic                |
| mmu-mir-350-a      | mmu-miR-350    | 0.006362     | 0.043      | 0.6347267                                      | 1qH4            | Cep170                    |
| mmu-mir-181b-2-a   | mmu-miR-181b2  | 0.000531     | 0.017      | 0.6306914                                      | 2qB             | Nr6a1                     |
| mmu-mir-24-1-3p-a  | mmu-miR-24-1   | 0.005264     | 0.04       | 0.5830452                                      | 13qB3           | 201011101Rik              |
| mmu-mir-145-a      | mmu-miR-145    | 0.00472      | 0.037      | 0.5319038                                      | 18qE1           | intergenic                |
| mmu-mir-29b-2-a    | mmu-miR-29b-2  | 0.006869     | 0.045      | 0.5296058                                      | 1qH6            | intergenic                |
| mmu-mir-29a-a      | mmu-miR-29a    | 0.003342     | 0.032      | 0.5275639                                      | 6qA3.3          | intergenic                |
| mmu-mir-100-a      | mmu-miR-100    | 0.006233     | 0.043      | 0.4929604                                      | 9qA5.1          | intergenic                |
| mmu-mir-7-1-p      | mmu-miR-7a*    | 0.004432     | 0.036      | 0.4871287                                      | 13qB1           | Hnrpk                     |
| mmu-mir-99a-a      | mmu-miR-99a    | 0.006783     | 0.045      | 0.48036                                        | 16qC3.1         | ENSMUST00000114231        |
| mmu-mir-29b-1-a    | mmu-miR-29b1   | 0.001331     | 0.021      | 0.4654417                                      | 6qA3.3          | intergenic                |
| mmu-mir-374-5p-a   | mmu-miR-374    | 0.002855     | 0.031      | 0.4551034                                      | XqD             | intergenic                |
| mmu-mir-29b-a      | mmu-miR-29b1   | 0.000838     | 0.017      | 0.4428428                                      | 6qA3.3          | intergenic                |
| mmu-mir-699-a      | mmu-miR-699    | 0.005792     | 0.041      | 0.4347244                                      | 4qB1            | intergenic                |
| mmu-mir-143-a      | mmu-miR-143    | 0.000602     | 0.017      | 0.4279341                                      | 18qE1           | intergenic                |
| mmu-mir-29c-a      | mmu-miR-29c    | 0.000231     | 0.016      | 0.426982                                       | 1qH6            | intergenic                |
| mmu-mir-181a-5p-a  | mmu-miR-181a1  | 0.000005     | 0.001      | 0.4178815                                      | 1qE4            | intergenic                |
| mmu-let-7f-1-a     | mmu-let-7f-1   | 0.000965     | 0.017      | 0.3740281                                      | 13qA5           | intergenic                |
| mmu-mir-181c-a     | mmu-miR-181c   | 7.1E-06      | 0.001      | 0.3732678                                      | 8qC3            | intergenic                |
| mmu-mir-150-a      | mmu-miR-150    | 0.000712     | 0.017      | 0.30775                                        | 7qB4            | intergenic                |
| mmu-mir-329-a      | mmu-miR-329    | 0.001198     | 0.019      | 2.9623986                                      | 12qF1           | intergenic                |
| mmu-mir-361-a      | mmu-miR-361    | 0.003111     | 0.032      | 0.6709635                                      | XqE1            | Chm                       |
| mmu-mir-213-a      | mmu-miR-181b-1 | 0.000876     | 0.017      | 0.6562348                                      | 1qE4            | intergenic                |

|                      |                |          |       |           |      |            |
|----------------------|----------------|----------|-------|-----------|------|------------|
| mmu-mir-140*-3p-a    | mmu-miR-140*   | 0.003978 | 0.034 | 0.5773119 | 8qD3 | Wwp2       |
| mmu-mir-24-2-a/p     | mmu-miR-24-2   | 0.008887 | 0.055 | 0.5548202 | 8qC3 | intergenic |
| mmu-mir-425-p        | mmu-miR-425    | 0.000734 | 0.017 | 0.5124673 | 9qF2 | intergenic |
| mmu-mir-199a*-3p-a   | mmu-miR-199a-1 | 0.00349  | 0.032 | 0.4501314 | 9qA3 | Dnm2       |
| mmu-mir-199a*-1-3p-a | mmu-miR-199a-1 | 0.002791 | 0.031 | 0.3670654 | 9qA3 | Dnm2       |

**Supplemental Table 3:** Differential expression of miRNAs, based on microarray data, between *C. parvum* treated and control p53 knockout mice.

| <u>MiRNA Probe</u>   | <u>MiRNA</u>   | <u>P-Val</u> | <u>FDR</u> | <u>Fold change</u><br><u>C. Parv vs.</u><br><u>Control</u> | <u>Location</u> | <u>Host Gene</u>         |
|----------------------|----------------|--------------|------------|------------------------------------------------------------|-----------------|--------------------------|
| mmu-mir-486-a        | mmu-miR-486    | 0.000144     | 0.0054636  | 5.49                                                       | 8qA2            | Ank1, Q02357-2, Q02357-8 |
| mmu-mir-451-p        | mmu-miR-451    | 0.002187     | 0.0196976  | 3.13                                                       | 11qB5           | intergenic               |
| mmu-mir-486-p        | mmu-miR-486    | 0.004523     | 0.0283081  | 2.4                                                        | 8qA2            | Ank1, Q02357-2, Q02357-8 |
| mmu-mir-222-a        | mmu-miR-222    | 0.000119     | 0.0054636  | 2.39                                                       | XqA1.3          | intergenic               |
| mmu-mir-451-a        | mmu-miR-451    | 0.003367     | 0.0230202  | 2.23                                                       | 11qB5           | intergenic               |
| mmu-mir-207-a        | mmu-miR-207    | 0.004686     | 0.0287318  | 1.93                                                       | 4qA5            | Dnaja1                   |
| mmu-mir-326-a        | mmu-miR-326    | 0.00531      | 0.0319595  | 1.77                                                       | 7qE2            | Arrb1                    |
| mmu-mir-702-a        | mmu-miR-702    | 0.003628     | 0.0240606  | 1.71                                                       | 5qG2            | Plod3                    |
| mmu-mir-328-a        | mmu-miR-328    | 0.007963     | 0.0386246  | 1.69                                                       | 8qD3            | Elmo3                    |
| mmu-mir-223-a        | mmu-miR-223    | 0.005804     | 0.0322758  | 1.69                                                       | XqC3            | intergenic               |
| mmu-mir-290-a        | mmu-miR-290-5p | 0.002465     | 0.0205442  | 1.68                                                       | 7qA1            | intergenic               |
| mmu-mir-330-p        | mmu-miR-330    | 0.003376     | 0.0230202  | 1.61                                                       | 7qA3            | Emi2                     |
| mmu-mir-335-p        | mmu-miR-335    | 0.005446     | 0.0321791  | 1.52                                                       | 6qA3.3          | Mest                     |
| mmu-mir-125b-1-a     | mmu-miR-125b-2 | 0.005694     | 0.0322758  | 0.49                                                       | 16qC3.1         | intergenic               |
| mmu-mir-213-a        | mmu-miR-181b-1 | 0.000284     | 0.0082008  | 0.49                                                       | 1qE4            | intergenic               |
| mmu-mir-29a-a        | mmu-miR-29a    | 0.000377     | 0.0094325  | 0.48                                                       | 6qA3.3          | intergenic               |
| mmu-mir-374-5p-a     | mmu-miR-374    | 0.004529     | 0.0283081  | 0.47                                                       | XqD             | intergenic               |
| mmu-mir-7-1-p        | mmu-miR-7a1    | 0.001521     | 0.0190088  | 0.47                                                       | 13qB1           | Hnrpk                    |
| mmu-mir-500-a        | mmu-miR-500    | 0.001717     | 0.0191132  | 0.47                                                       | XqA1.1          | Clcn5                    |
| mmu-mir-145-a        | mmu-miR-145    | 0.002184     | 0.0196976  | 0.46                                                       | 18qE1           | intergenic               |
| mmu-mir-125b-2-a     | mmu-miR-125b-2 | 0.002713     | 0.0217301  | 0.45                                                       | 16qC3.1         | intergenic               |
| mmu-mir-29b-a        | mmu-miR-29b1   | 0.000135     | 0.0054636  | 0.45                                                       | 6qA3.3          | intergenic               |
| mmu-mir-199a*-1-3p-a | mmu-miR-199a-1 | 0.005635     | 0.0322758  | 0.45                                                       | 9qA3            | Dnm2                     |
| mmu-mir-139-a        | mmu-miR-139    | 0.002052     | 0.0196976  | 0.44                                                       | 7qE3            | Pde2a                    |
| mmu-mir-29c-a        | mmu-miR-29c    | 0.000467     | 0.0100811  | 0.44                                                       | 1qH6            | intergenic               |

|                    |                |          |           |      |         |                    |
|--------------------|----------------|----------|-----------|------|---------|--------------------|
| mmu-mir-181b-2-a   | mmu-miR-181b2  | 0.000303 | 0.0082008 | 0.44 | 2qB     | Nr6a1              |
| mmu-mir-532-p      | mmu-miR-532    | 0.001656 | 0.0191132 | 0.43 | 18qE1   | intergenic         |
| mmu-mir-199a*-3p-a | mmu-miR-199a-1 | 0.001371 | 0.017823  | 0.43 | 9qA3    | Dnm2               |
| mmu-mir-143-a      | mmu-miR-143    | 0.000496 | 0.0100811 | 0.43 | 18qE1   | intergenic         |
| mmu-mir-24-2-a/p   | mmu-miR-24-2   | 0.000892 | 0.0132127 | 0.42 | 8qC3    | intergenic         |
| mmu-mir-181b-1-a   | mmu-miR-181b1  | 0.000151 | 0.0054636 | 0.41 | 1qE4    | intergenic         |
| mmu-mir-100-a      | mmu-miR-100    | 0.006096 | 0.0330216 | 0.41 | 9qA5.1  | intergenic         |
| mmu-mir-125b-a     | mmu-miR-125b-2 | 0.000534 | 0.0101707 | 0.41 | 16qC3.1 | intergenic         |
| mmu-mir-99a-a      | mmu-miR-99a    | 0.000563 | 0.0101707 | 0.39 | 16qC3.1 | ENSMUST00000114231 |
| mmu-mir-703-a      | mmu-miR-703    | 0.000894 | 0.0132127 | 0.38 | 5qE3    | 1700007G11Rik      |
| mmu-mir-181a-5p-a  | mmu-miR-181a1  | 6.51E-05 | 0.0052894 | 0.35 | 1qE4    | intergenic         |
| mmu-mir-181c-a     | mmu-miR-181c   | 0.000118 | 0.0054636 | 0.32 | 8qC3    | intergenic         |
| mmu-mir-297b-p     | mmu-miR-297b   | 1.53E-05 | 0.0049725 | 0.31 | 2qA1    | Sfmbt2             |
| mmu-mir-699-a      | mmu-miR-699    | 5.92E-05 | 0.0052894 | 0.27 | 4qB1    | intergenic         |

---
